# Supplementary material for: Potentiometric Chemical Sensors Based on Metal Halide Doped Chalcogenide Glasses for Sodium Detection
Source: MDPI journal article supplement (doi:10.3390/s22249986), 2022-12-18
Supplement: s1 [file s1]

# Supplementary Materials

## Potentiometric chemical sensors based on metal halide doped chalcogenide glasses for sodium detection

Maria Bokova <sup>1,\*</sup>, Steven Dumortier <sup>1</sup>, Christophe Poupin<sup>2</sup>, Renaud Cousin<sup>2</sup>, Mohammad Kassem <sup>1</sup> and Eugene Bychkov <sup>1</sup>

<sup>1</sup> Université du Littoral Côte d'Opale (ULCO), Laboratoire de Physico-Chimie de l'Atmosphère (LPCA), EA 4493, 59140 Dunkerque, France

<sup>2</sup> Université du Littoral Côte d'Opale (ULCO), Unité de Chimie Environnementale et Interactions sur le Vivant (UCEIV), UR 4492, SFR Condorcet FR CNRS 3417, 59140 Dunkerque, France

\* Correspondence: Maria.Bokova@univ-littoral.fr; Tel.: +33 2 28 65 82 70

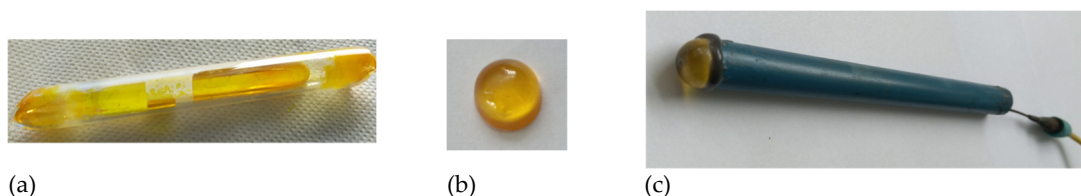

**Figure S1.** The photos of the typical AgI-NaI-Ga<sub>2</sub>S<sub>3</sub>-GeS<sub>2</sub> glasses and Na<sup>+</sup>-ISE taking the (AgI)<sub>22.5</sub>(NaI)<sub>7.5</sub>(Ga<sub>2</sub>S<sub>3</sub>)<sub>26</sub>(GeS<sub>2</sub>)<sub>44</sub> sample as an example: (a) the silica tube (ID/OD of 8/10 mm) quenched horizontally with 3g of the melt; (b) the semi-spherical shaped membrane for ISE obtained by vertical quenching of the silica tube (ID/OD of 10/12 mm) with 1.5 g of the sample; (c) the fabricated liquid contact chemical sensor with the sensitive membrane glued on the PVC tube filled with the NaCl (0.1 M) solution and the AgCl coated silver wire.

**Table S1.** Macroscopic properties of the (NaHal)<sub>15</sub>(Ga<sub>2</sub>S<sub>3</sub>)<sub>23</sub>(GeS<sub>2</sub>)<sub>62</sub> (Hal = Cl, I) compositions: density,  $d$ , glass transition temperature,  $T_g$ , the room-temperature conductivity  $\sigma_{298}$ , the activation energy  $E_\sigma$ , and the pre-exponential factor  $A^1$ .

| Glass composition | $d$ (g cm <sup>-3</sup> ) | $T_g$ (°C) | $\log \sigma_{298}$<br>(S cm <sup>-1</sup> ) | $E_\sigma$<br>(eV) | $\log A$<br>(S cm <sup>-1</sup> K) |
|-------------------|---------------------------|------------|----------------------------------------------|--------------------|------------------------------------|
| Y = Cl            | 2.86(2)                   | 355(10)    | -7.13(6)                                     | 0.48(2)            | 3.48(17)                           |
| Y = I             | 3.03(2)                   | 364(10)    | -6.18(2)                                     | 0.44(1)            | 3.80(6)                            |

<sup>1</sup> Uncertainties in the last digit(s) of the parameter are given in parentheses.

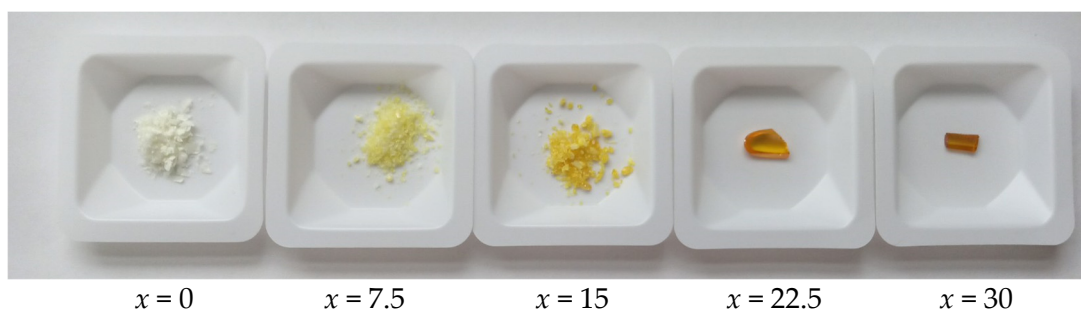

**Figure S2.** The photos of the (AgI)<sub>x</sub>(NaI)<sub>30-x</sub>(Ga<sub>2</sub>S<sub>3</sub>)<sub>26</sub>(GeS<sub>2</sub>)<sub>44</sub> samples,  $x = 0, 7.5, 15, 22.5$  and 30 mol.% AgI, taken 6 months after soaking in water during 2 weeks.

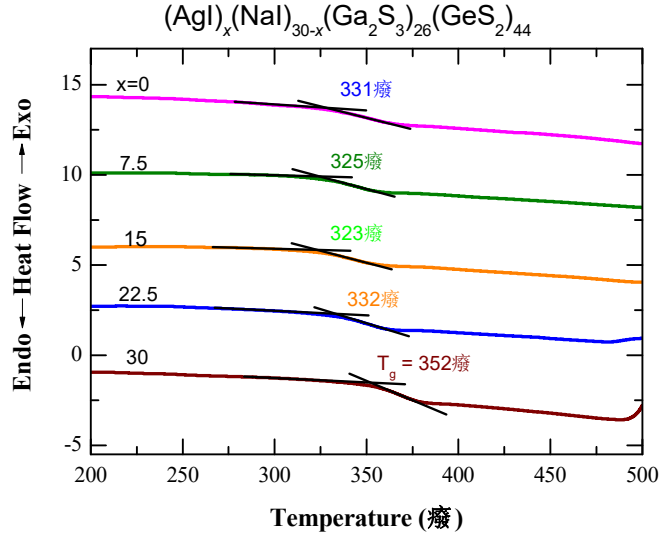

**Figure S3.** Typical DSC curves of the  $(\text{AgI})_x(\text{NaI})_{30-x}(\text{Ga}_2\text{S}_3)_{26}(\text{GeS}_2)_{44}$  glasses,  $x = 0, 7.5, 15, 22.5$  and  $30$  mol.% AgI.

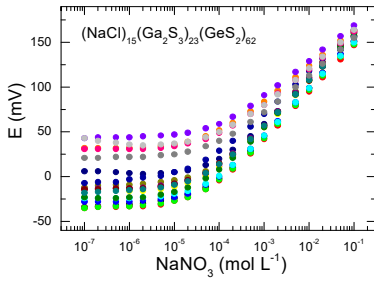

(a)

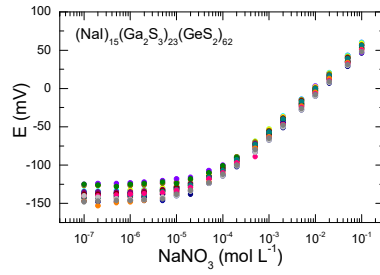

(b)

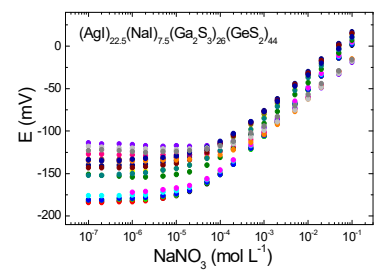

(c)

**Figure S4.** Calibration curves obtained during one month period for  $\text{Na}^+$  sensors based on (a)  $(\text{NaCl})_{15}(\text{Ga}_2\text{S}_3)_{23}(\text{GeS}_2)_{62}$ , (b)  $(\text{NaI})_{15}(\text{Ga}_2\text{S}_3)_{23}(\text{GeS}_2)_{62}$  and (c)  $(\text{AgI})_{22.5}(\text{NaI})_{7.5}(\text{Ga}_2\text{S}_3)_{26}(\text{GeS}_2)_{44}$  glass membranes.
